# Supplementary material for: Identification of four novel T cell autoantigens and personal autoreactive profiles in multiple sclerosis
Source: PubMed Central journal article supplement (PMC9045615; doi:10.1126/sciadv.abn1823), 2022-04-27
Supplement: sciadv.abn1823_sm.pdf [file sciadv.abn1823_sm.pdf]

Supplementary Materials for  
**Identification of four novel T cell autoantigens and personal autoreactive profiles in multiple sclerosis**

Mattias Bronge\*, Klara Asplund Högelin, Olivia G. Thomas, Sabrina Ruhrmann, Claudia Carvalho-Queiroz, Ola B. Nilsson, Andreas Kaiser, Manuel Zeitelhofer, Erik Holmgren, Mathias Linnerbauer, Milena Z. Adzemovic, Cecilia Hellström, Ivan Jelcic, Hao Liu, Peter Nilsson, Jan Hillert, Lou Brundin, Katharina Fink, Ingrid Kockum, Katarina Tengvall, Roland Martin, Hanna Tegel, Torbjörn Gräslund, Faiez Al Nimer, André Ortlieb Guerreiro-Cacais, Mohsen Khademi, Guro Gafvelin, Tomas Olsson, Hans Grönlund

\*Corresponding author. Email: [mattias.bronge@ki.se](mailto:mattias.bronge@ki.se)

Published 27 April 2022, *Sci. Adv.* **8**, eabn1823 (2022)  
DOI: [10.1126/sciadv.abn1823](https://doi.org/10.1126/sciadv.abn1823)

**The PDF file includes:**

Figs. S1 to S7  
Tables S1 to S3  
Legends for data S1 to S8

**Other Supplementary Material for this manuscript includes the following:**

Data S1 to S8

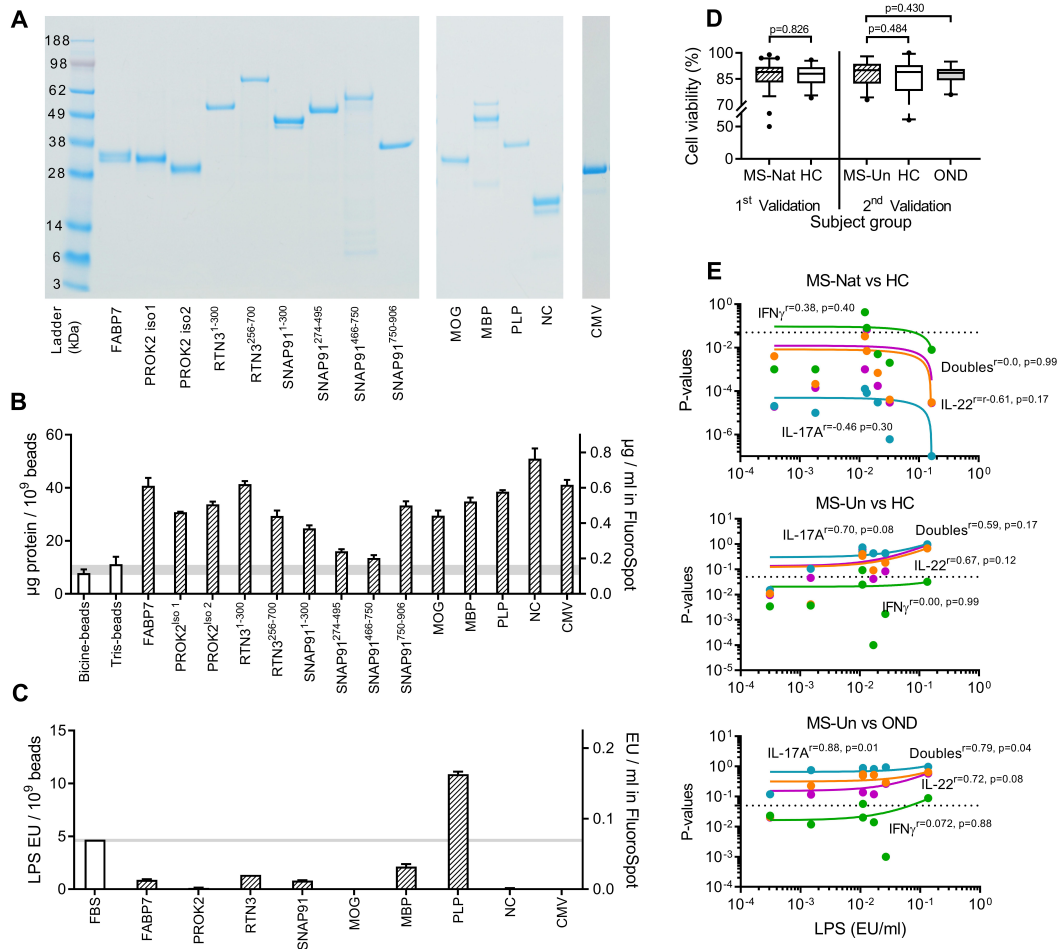

**Fig. S1. Full-length antigen panel quality control.** **A**, SDS-page gels of the full-length antigens used in the FluoroSpot-assay validations. Molecular size ladder with size indicators in the leftmost lane. Picture derived from three different gels, each containing a lane with the same ladder (cropped out) and the bands' locations in relation to the ladder are consistent. Brightness, contrast, and colour temperature corrections have been made. **B**, The protein content of the final, endotoxin-washed antigen beads compared to beads coupled with bicine and tris. Bars represent the mean and staples the SD of the intra-assay replicates. Bars are plotted on both the left and right y-axis (resulting protein concentration in the FluoroSpot-assay). The horizontal gray line represents the negative control results. **C**, LPS concentration of the finished, endotoxin-washed, and pooled antigen-beads and the fetal bovine serum (FBS) used in the cell media. Bars represent mean and staples SD of the intra-assay replicates. LPS content in antigen-bead preparations is plotted on both the left (endotoxin units (EU) per  $10^9$  beads) and the right y-axis (resulting EU per ml in the FluoroSpot assay). FBS is only plotted on the right y-axis. The horizontal gray line represents the LPS (EU/ml) of the FBS. **D**, Comparison of the different cohorts' PBMC viability after thawing. Box represents median and IQR and brackets the 5-95 percentile. P-values calculated using a two-tailed Mann-Whitney U-test. **E**, Correlation of the p-values of the difference in autoantigen responses for the 1<sup>st</sup> (top graph) and 2<sup>nd</sup> (bottom graphs) validation runs and autoantigen LPS content. IFN $\gamma$  in green, IL-22 in orange, IL-17A in blue, and double-cytokines in magenta. Lines represent linear regression slopes. Dotted line at  $p=0.05$ . P- and r-values were calculated using two-tailed non-parametric Spearman-correlation.

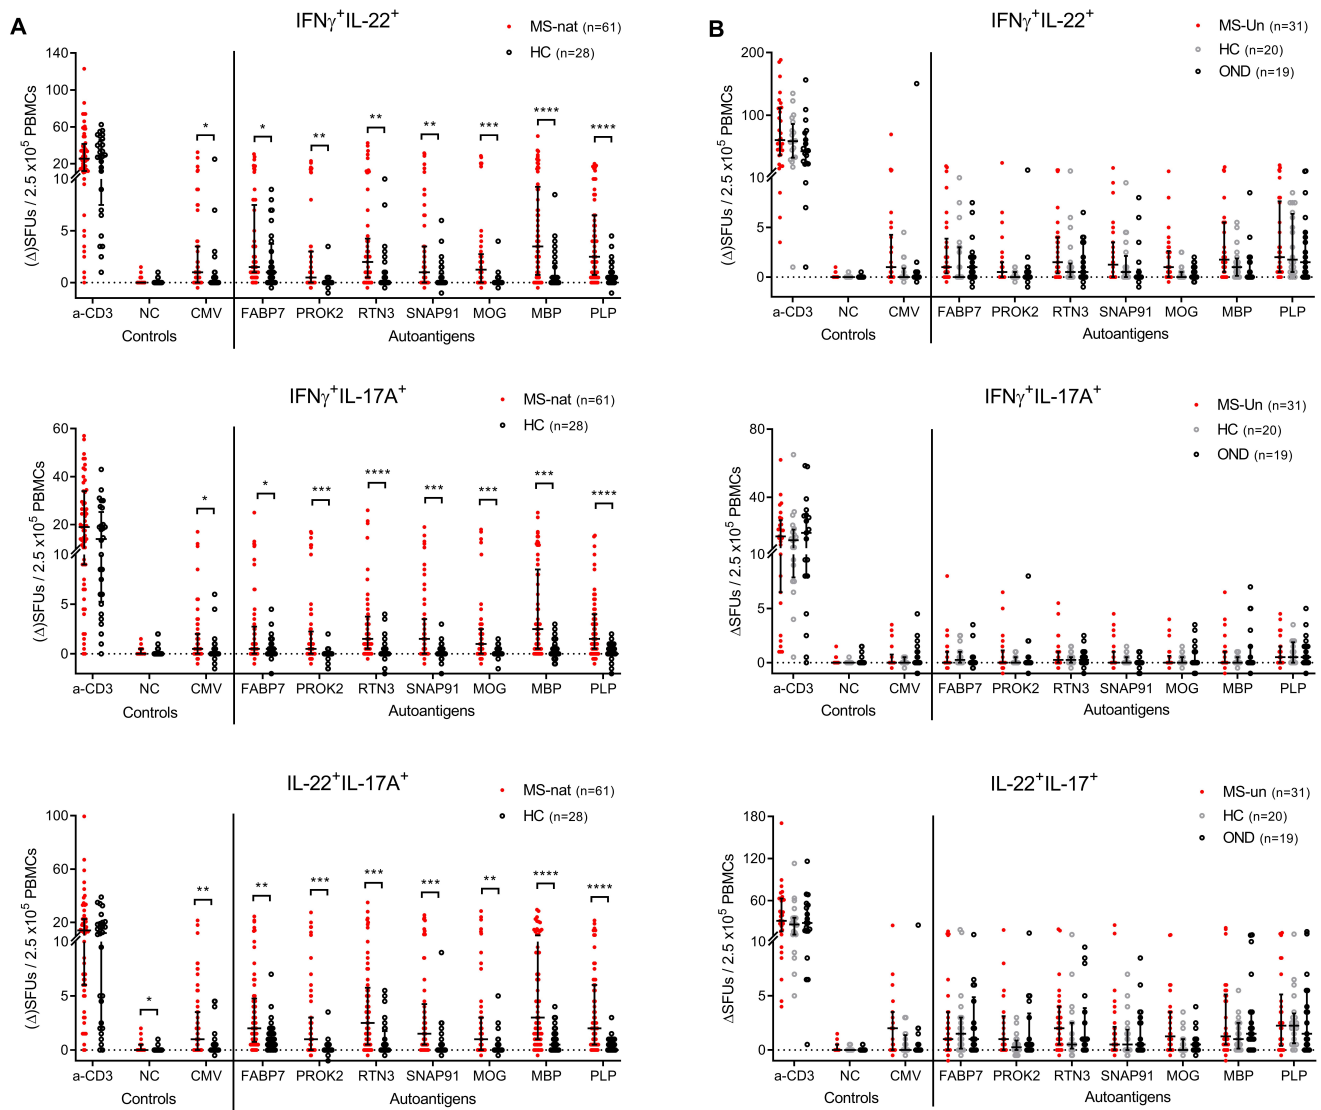

**Fig. S2. Double cytokine-producing cells.** Double cytokine-producing cells in the IFN $\gamma$ /IL-22/IL-17A FluoroSpot assay. **A**, Results from the 1<sup>st</sup> validation cohort, using natalizumab-treated persons with MS. Each dot represents one individual with brackets representing median and IQR. The results from the anti-CD3 positive control stimulation are plotted as  $\Delta$ SFUs /  $1.25 \times 10^5$  PBMCs and NC are plotted as raw SFUs /  $2.5 \times 10^5$  PBMCs. P-values were calculated with a two-tailed Mann-Whitney U-test with Bonferroni correction for multiple comparisons ( $n=10$ ). \* $p<0.05$ , \*\* $p<0.01$ , \*\*\* $p<0.001$ . **B**, Results from the 2<sup>nd</sup> validation cohort, using untreated persons with MS, presented as in (A).

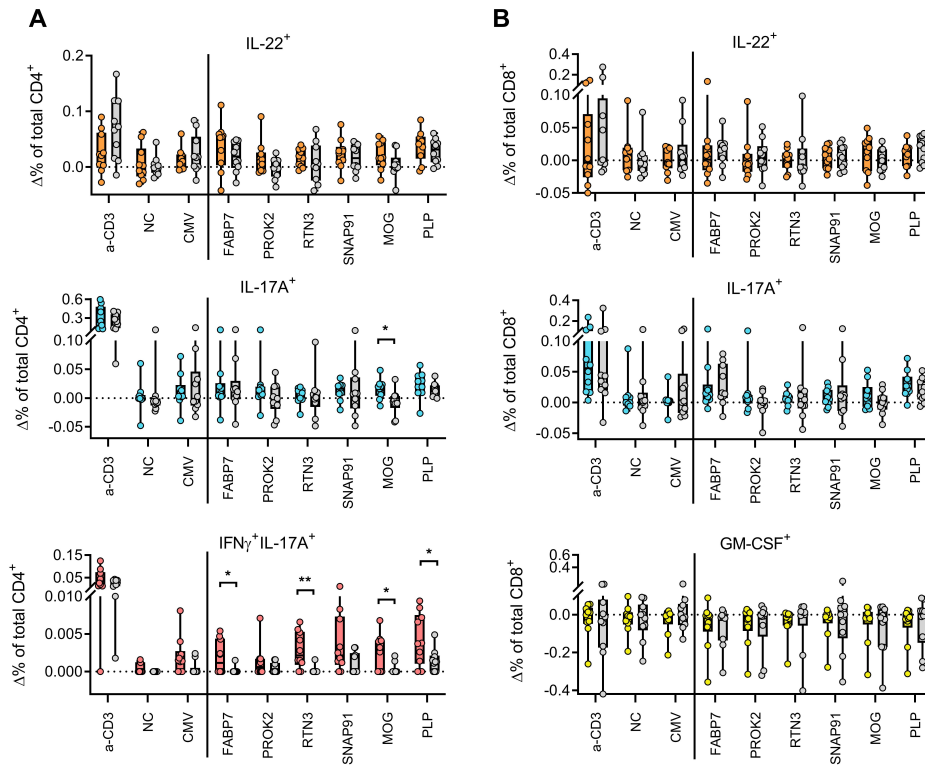

**Fig. S3. Intracellular cytokine staining after autoantigen stimulation.** Flow cytometry analysis of autoreactive T cells using intracellular staining after autoantigen stimulation. **A**, IL-22, IL-17A, and double-positive IFN $\gamma$ <sup>+</sup>IL-17A<sup>+</sup> responses in CD4<sup>+</sup> T cells after stimulation with autoantigens or control antigens. **B**, IL-22, IL-17A, and GM-CSF responses in CD8<sup>+</sup> T cells. Plotted as % of the total population after subtracting background responses (no stimuli,  $\Delta\%$ ). Boxes represent median and IQR. MS (n=10) in color, HC (n=10) in gray open circles. P-values calculated using a two-tailed Mann-Whitney U-test and written when significant. \*p<0.05, \*\*p<0.01.

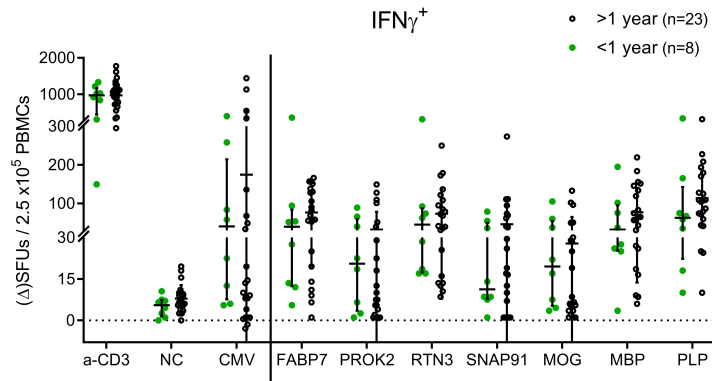

**Fig. S4. Short versus long disease duration.** IFN $\gamma$  responses of untreated MS persons, stratified based on first known symptoms within one year of sampling (<1 year, mean and SD 0.49  $\pm$  0.18 years) or longer disease duration (>1 year, mean and SD 4.9  $\pm$  3.3 years). P-values were calculated using two-tailed Mann-Whitney U-tests and none were significant (p=0.22-0.94 in all cases).

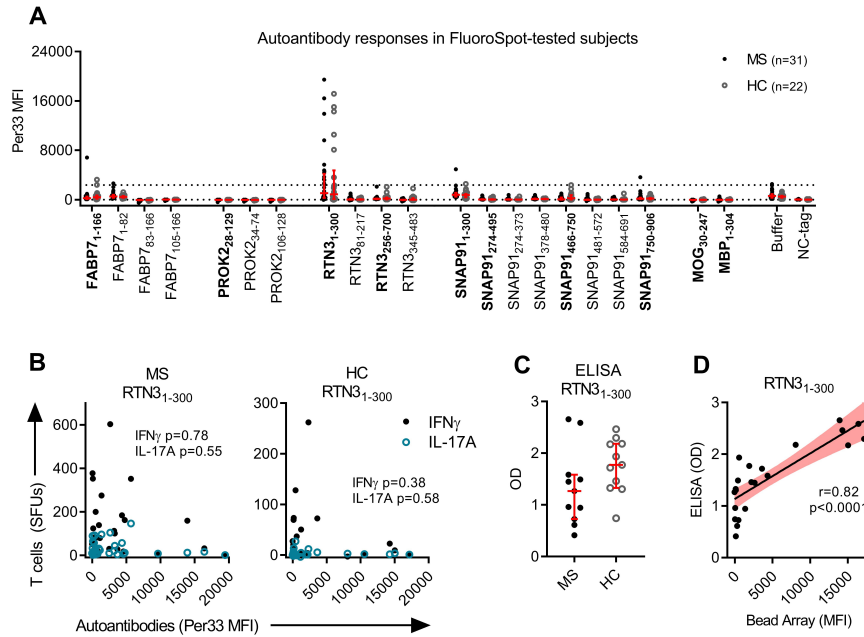

**Fig. S5. Autoantibody and T cell correlation, and RTN3 validation.** **A**, Results from the suspension bead array autoantibody detection in pwMS (n=31) and HC (n=22) which had also been tested for T cell reactivity using the FluoroSpot assay in the 1<sup>st</sup> validation cohort. Both full length antigens used in the FluoroSpot assay (x-axis, bold) and PrESTs (x-axis, not bold) were tested. The number denotes the amino acids covered in the protein. Dotted line at the threshold for positivity (MFI=2350). Brackets denote median and IQR. **B**, Correlation analysis between the suspension bead array (**A**) and FluoroSpot IFN $\gamma$  (black filled circles) and IL-17A (blue open circles) responses to RTN3<sub>1-300</sub> for pwMS (left graph) and HCs (right graph). P-values calculated using a two-tailed non-parametric Spearman correlation. **C**, Enzyme-linked immunosorbent assay (ELISA) detecting autoantibodies to a second version of RTN3<sub>1-300</sub> which did not contain the NC-tag contained in the previous RTN3<sub>1-300</sub> version, testing both pwMS and HC (n=11 in each group) also tested in (**A**). **D**, Correlation of the results from ELISA (OD, y-axis) and values were calculated using a two-tailed non-parametric Spearman correlation. MFIs: Median fluorescent intensity.

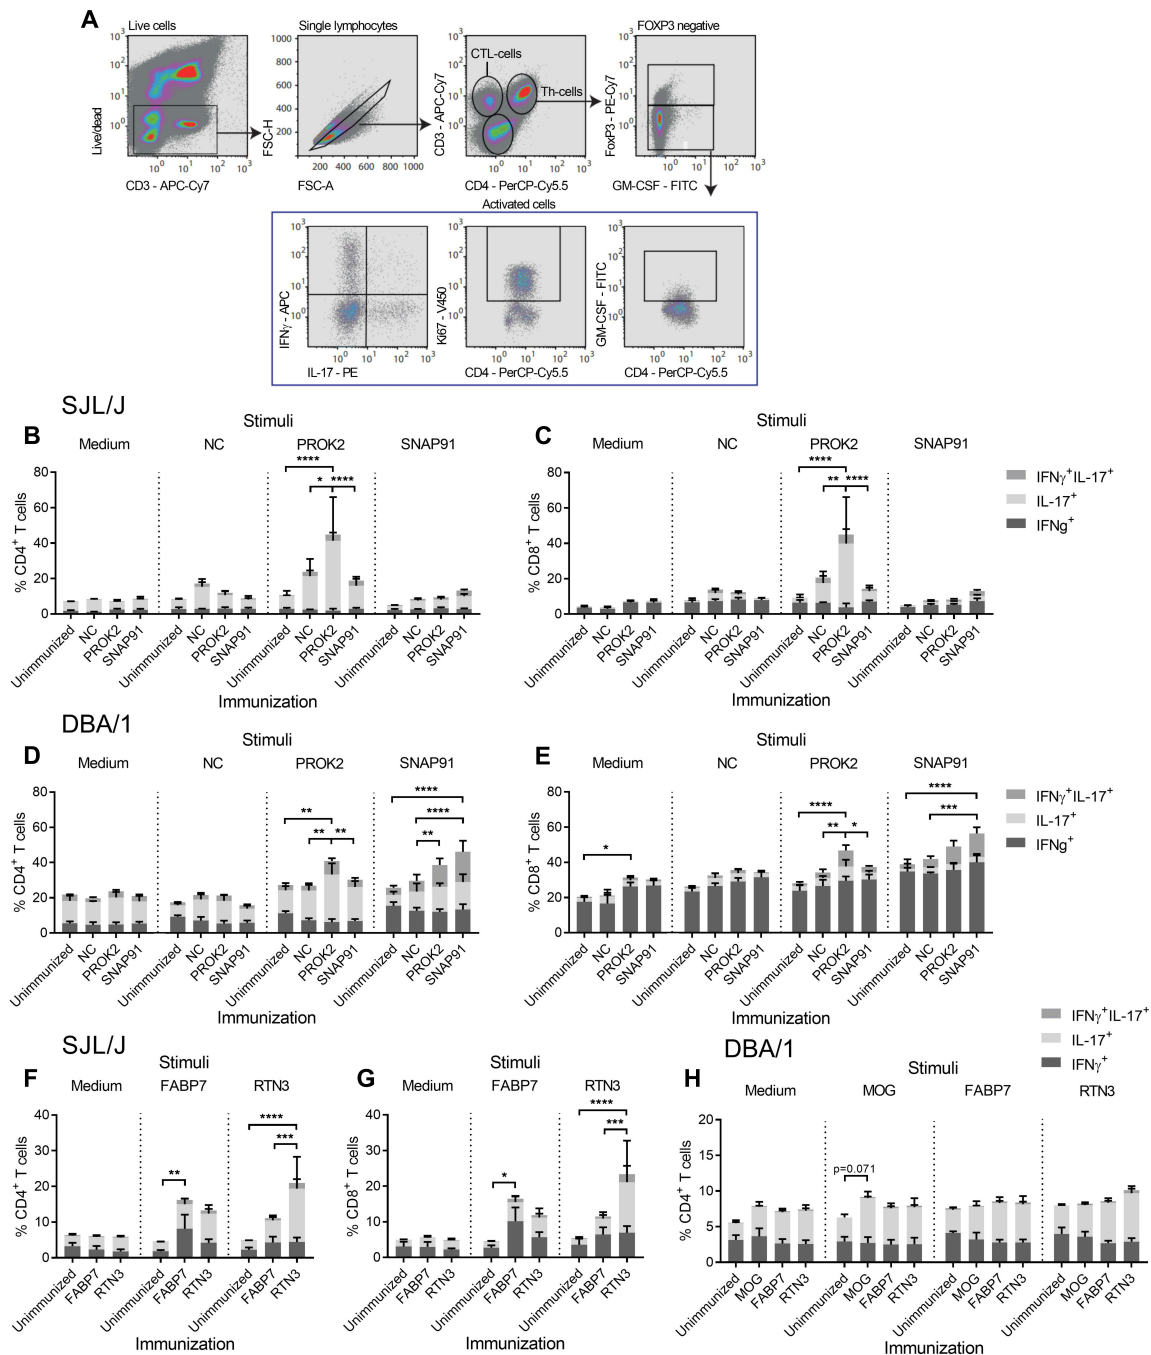

**Fig. S6. Immune responses in autoantigen-immunized mice.** Recall responses to the novel autoantigens in immunized mice. **A**, Gating strategy of cytokine responses. **B** and **C**, CD4<sup>+</sup> and CD8<sup>+</sup> T cell responses to medium only, NC, PROK2 and SNAP91 in unimmunized (n=3), NC (n=3), PROK2 (n=6) and SNAP91 (n=6) immunized SJL/J mice. **D** and **E**, Responses to medium only, NC, PROK2 and SNAP91 in unimmunized (n=3), NC- (n=3), PROK2- (n=6) and SNAP91- (n=6) immunized DBA/1 mice. **F** and **G**, Responses to medium only, FABP7 and RTN3 in unimmunized (n=3), FABP7 (n=7), and RTN3 (n=7) immunized SJL/J mice. NC was omitted as versions of FABP7 and RTN3 without the NC-tag were used for both immunisation and stimuli. **H**, CD4<sup>+</sup> responses to medium only, MOG, FABP7 and RTN3 in unimmunized

(n=3), MOG (n=3), FABP7 (n=8) and RTN3 (n=8) immunized DBA/1 mice. Stacked bar graphs represent the mean  $\pm$ SD cytokine positive cells as % of the total CD4<sup>+</sup> or CD8<sup>+</sup> cell population. The different cytokine responses are stacked on top of each other. X-axes denote the immunisation and dotted lines separate the different stimuli used ex vivo. P-values calculated using a two-tailed ANOVA with Tukey's correction for multiple comparisons and written when significant. ANOVA test based on the total % of cytokine-producing cells, not individual cytokines. \*p<0.05, \*\*p<0.01, \*\*\*p<0.001, \*\*\*\*p<0.0001.



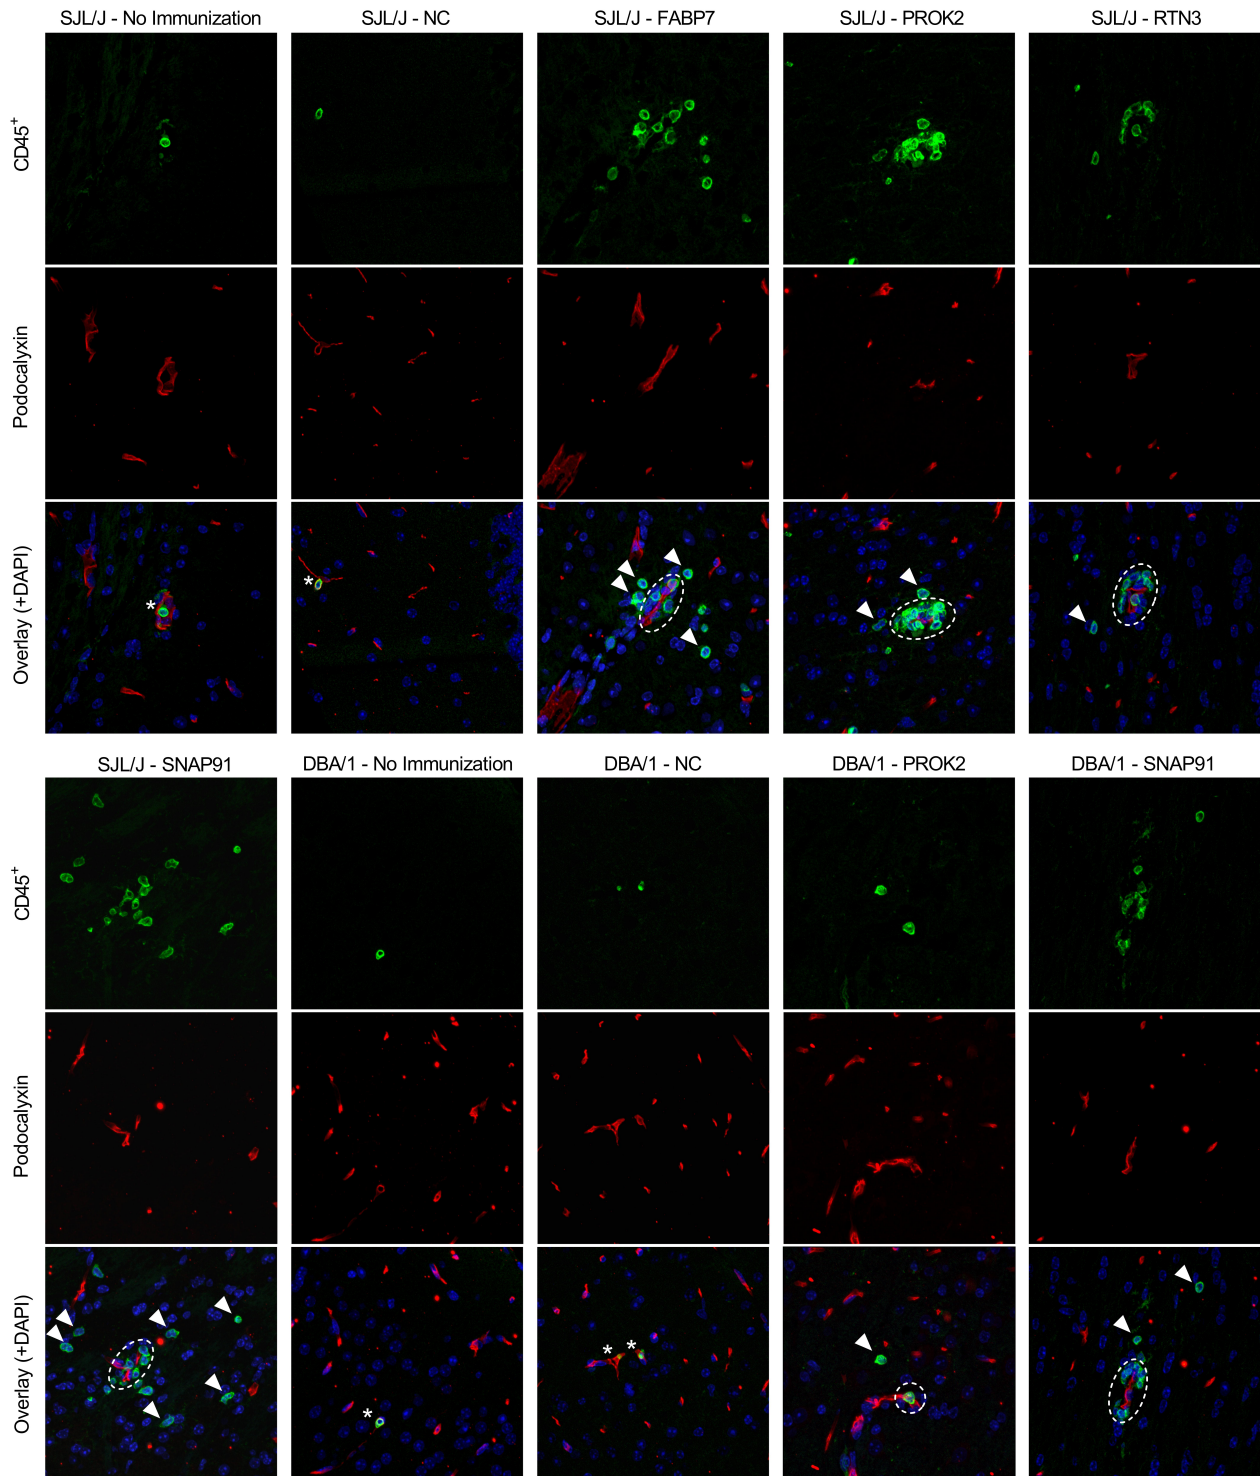

**Fig. S7. Location of CNS-infiltrating leukocytes.** Representative immunofluorescence of infiltrating leukocytes in the brain of control or autoantigen immunized mice. Top image shows leukocytes (CD45<sup>+</sup>, green), middle image blood vessels (Podocalyxin, red) and the bottom image the overlaid image together with cell nuclei (DAPI, blue). Arrowheads indicate intraparenchymal leukocytes, dotted white circles indicate perivascular leukocytes and asterixis indicate intravascular leukocytes.

**Table S1. Autoantigen screening panel**

| Protein          | PrEST       | Pool # | Protein     | PrEST       | Pool # |
|------------------|-------------|--------|-------------|-------------|--------|
| MBP              | HPRR2850726 | 1      | PROK2       | HPRR3420049 | 23     |
| MBP              | HPRR2850727 | 1      | PROK2       | HPRR3420050 | 23     |
| MAG              | HPRR4220035 | 2      | PTPRZ1      | HPRR1920026 | 24     |
| CNP              | HPRR2500893 | 3      | PTPRZ1      | HPRR1920027 | 24     |
| CNP              | HPRR2500894 | 3      | PTPRZ1      | HPRR4170025 | 24     |
| CNP              | HPRR2500895 | 3      | RAB3A       | HPRR3440020 | 25     |
| CNP              | HPRR2500896 | 3      | RP11-35N6.1 | HPRR2180045 | 25     |
| CRYAB            | HPRR2700063 | 4      | RP11-35N6.1 | HPRR2180046 | 25     |
| CRYAB            | HPRR3880249 | 4      | RP11-35N6.1 | HPRR2990130 | 25     |
| S100B            | HPRR2190015 | 2      | RTN3        | HPRR2060024 | 26     |
| OMG              | HPRR1920061 | 5      | RTN3        | HPRR2060025 | 26     |
| OMG              | HPRR1920062 | 5      | SDK2        | HPRR1950089 | 26     |
| MOG              | HPRR2110197 | 6      | SDK2        | HPRR4160333 | 26     |
| MOBP             | HPRR2960632 | 7      | SH3GL2      | HPRR2470124 | 27     |
| MOBP             | HPRR4000195 | 7      | SH3GL2      | HPRR4110124 | 27     |
| PLP1             | HPRR4180637 | 8      | SLC1A2      | HPRR1920041 | 28     |
| ENO1, ENO2, ENO3 | HPRR3360053 | 8      | SLC1A2      | HPRR4180078 | 28     |
| ALDOC            | HPRR4180083 | 8      | SLC1A3      | HPRR3010202 | 28     |
| GFAP             | HPRR350056  | 9      | SLC1A3      | HPRR3010204 | 28     |
| GFAP             | HPRR3830174 | 9      | SNAP25      | HPRR4180848 | 29     |
| GFAP             | HPRR3830175 | 9      | SNAP91      | HPRR2570095 | 29     |
| NFASC            | HPRR1920078 | 10     | SNAP91      | HPRR2570096 | 29     |
| NFASC            | HPRR4190813 | 10     | SNAP91      | HPRR2570097 | 29     |
| PEBP1            | HPRR1920014 | 11     | SNAP91      | HPRR2570098 | 29     |
| PEBP1            | HPRR4160717 | 11     | SNCB        | HPRR3010074 | 30     |
| CLDN11           | HPRR2010004 | 12     | STMN3       | HPRR1510042 | 30     |
| CLDN11           | HPRR2010005 | 12     | STX1A       | HPRR2870039 | 30     |
| CLDN11           | HPRR4160179 | 12     | TMOD2       | HPRR3100160 | 30     |
| ASCL1            | HPRR2840074 | 13     | TRIM2       | HPRR3000109 | 31     |
| A1BG             | HPRR3140512 | 13     | TRIM2       | HPRR3000110 | 31     |
| A1BG             | HPRR3140513 | 13     | TRIM2       | HPRR3000111 | 31     |
| AFMID            | HPRR2501281 | 14     | UNC80       | HPRR3400083 | 32     |
| AFMID            | HPRR2501282 | 14     | UNC80       | HPRR3400086 | 32     |
| AFMID            | HPRR2501283 | 14     | UNC80       | HPRR3400088 | 32     |
| AFMID            | HPRR2501284 | 14     | WBSCR17     | HPRR1952128 | 33     |
| AMPH             | HPRR2440103 | 15     | WBSCR17     | HPRR1952129 | 33     |
| AMPH             | HPRR2440105 | 15     | HSPA4L      | HPRR3000429 | 33     |
| AMPH             | HPRR2440106 | 15     | HSPA4L      | HPRR3000431 | 33     |
| AQP4             | HPRR2140209 | 16     | B3GNT6      | HPRR1952320 | 34     |
| AQP4             | HPRR2140210 | 16     | B3GNT6      | HPRR3051098 | 34     |
| AQP4             | HPRR4040261 | 16     | MOAP1       | HPRR140345  | 34     |
| BCAN             | HPRR1920066 | 17     | CD9         | HPRR3720106 | 35     |
| BCAN             | HPRR4180961 | 17     | CD9         | HPRR4110045 | 35     |
| CYB561D2         | HPRR3460137 | 18     | TSPAN2      | HPRR2050163 | 36     |
| FABP7            | HPRR2060033 | 18     | TSPAN2      | HPRR4220588 | 36     |
| FABP7            | HPRR2060034 | 18     | PLLP        | HPRR3150044 | 36     |
| FABP7            | HPRR3970332 | 18     | MAL         | HPRR3460522 | 37     |
| ICAM5            | HPRR1950330 | 19     | MAL         | HPRR3761244 | 37     |
| ICAM5            | HPRR1950331 | 19     | CNTN1       | HPRR3140066 | 38     |
| MAP2             | HPRR1920010 | 20     | CNTN1       | HPRR3140067 | 38     |
| MAP2             | HPRR1920011 | 20     | INA         | HPRR1350076 | 39     |
| MAP6             | HPRR3050726 | 20     | NEFH        | HPRR221451  | 40     |
| MAP6             | HPRR3050727 | 20     | NEFH        | HPRR4160999 | 40     |
| MAP6             | HPRR3050728 | 20     | NEFM        | HPRR2540100 | 41     |
| MAPK10, 8, 9     | HPRR2900006 | 21     | NEFM        | HPRR2540101 | 41     |
| MAPK10           | HPRR3730021 | 21     | NEFM        | HPRR2540103 | 41     |
| MT3              | HPRR3440018 | 21     | CD46        | HPRR1950624 | 42     |
| MT3              | HPRR3920296 | 21     | CD46        | HPRR4180423 | 42     |
| NEURL            | HPRR3140302 | 22     | CD55        | HPRR280170  | 43     |
| NEURL            | HPRR3140303 | 22     | CD59        | HPRR2700037 | 44     |
| NEURL            | HPRR3140304 | 22     | KCNJ10      | HPRR4030424 | 45     |
| NOVA2            | HPRR3610021 | 23     | KCNJ10      | HPRR4030425 | 45     |

**Table S2. Cohort characteristics**

|                                | Screening cohort           |                        | 1 <sup>st</sup> Validation |                       | 2 <sup>nd</sup> Validation |                       |                        |
|--------------------------------|----------------------------|------------------------|----------------------------|-----------------------|----------------------------|-----------------------|------------------------|
|                                | MS-Nat<br>(RRMS)<br>(n=16) | HCs<br>(n=9)           | MS-Nat<br>(RRMS)<br>(n=61) | HCs<br>(n=28)         | MS-Un<br>(RRMS)<br>(n=31)  | HCs<br>(n=20)         | OND<br>(n=19)          |
| Age (years)                    | 42.1 ± 5.8<br>(32-53)      | 40.7 ± 11.1<br>(24-57) | 36.3 ± 9.7<br>(17-61)      | 33.9 ± 8.2<br>(20-49) | 34.2 ± 9.7<br>(19-58)      | 33.3 ± 6.8<br>(25-49) | 29.3 ± 10.5<br>(18-57) |
| Female sex<br>(n)              | 7 (38.9%)                  | 5 (55.6%)              | 44 (72.1%)                 | 21 (75.0%)            | 23<br>(74.2%)              | 15<br>(75.0%)         | 9 (47.4%)              |
| HLA-<br>DRB1*15:01<br>(n)      | 10 (62.5%)                 | Missing                | 28 / 56<br>(50.0%)         | 7 / 22<br>(31.8%)     | 11 / 23<br>(47.8%)         | 3 / 12<br>(25%)       | 10 / 13*<br>(76.9%)    |
| HLA-<br>A*02:01 (n)            | 8 (50.0%)                  | Missing                | 24 / 56<br>(42.9%)         | 14 / 22<br>(63.6%)    | 10 / 23<br>(43.5%)         | 7 / 12<br>(58.3%)     | Missing                |
| EDSS<br>(score)                | 2.5 ± 1.6<br>(1–5.5)       | -                      | 2.1 ± 1.5<br>(0.0–7.5)     | -                     | 1.5 ± 1.3<br>(0.0–6.5)     | -                     | -                      |
| Disease<br>Duration<br>(years) | 11.1 ± 5.2<br>(2.5–20.7)   | -                      | 8.9 ± 5.4<br>(1-20)        | -                     | 2.1 ± 3.1<br>(0.0–12.7)    | -                     | -                      |

± denotes SD. Range or percentage of whole in brackets. n / N denotes the number of individuals for which data was available if it was not the whole cohort. \*DR15-status in two cases based on the high linkage disequilibrium with DQB1\*06:02. RRMS: Relapsing-remitting MS. HCs: Healthy Controls. Nat: Natalizumab-treated. Un: Untreated. EDSS: Expanded Disability Status Scale.

**Table S3. Full-length autoantigen panel**

| Antigen  | Function                                        | Protein description                                          | UniProt ID | Endotoxin wash             |
|----------|-------------------------------------------------|--------------------------------------------------------------|------------|----------------------------|
| Anti-CD3 | Positive Control – Polyclonal T cell activation | Monoclonal CD3-2 antibody, Mouse IgG2a isotype.              | N/A        | N/A                        |
| NC       | Negative Control – Tag for production           | Albumin binding domain – Derived from Strep. Protein G. (69) | N/A        | 0.1 M NaOH                 |
| CMV      | Positive Control – Cytomegalovirus epitopes     | Fusion protein of 5 epitopes from PP65. (70)                 | N/A        | 0.75 M NaOH                |
| FABP7    | Novel Candidate Autoantigen                     | Fatty Acid Binding Protein 7 – Isoform 2 <sup>1-166</sup>    | O15540-2   | 0.5 M NaOH                 |
| PROK2    | Novel Candidate Autoantigen                     | Prokineticin-2 – Isoform 1 <sup>28-129</sup>                 | Q9HC23-1   | 1 M NaOH                   |
|          |                                                 | Prokineticin-2 – Isoform 2 <sup>28-108</sup>                 | Q9HC23-2   | 2 M NaOH + 1% Triton X-100 |
| RTN3     | Novel Candidate Autoantigen                     | Reticulon-3 <sup>1-300</sup>                                 | O95197     | 0.5 M NaOH                 |
|          |                                                 | Reticulon-3 <sup>256-700</sup>                               | O95197     | 2 M NaOH                   |
| SNAP91   | Novel Candidate Autoantigen                     | Synaptosome Associated Protein 91 <sup>1-300</sup>           | O60641     | 3 M NaOH + 1% Triton X-100 |
|          |                                                 | Synaptosome Associated Protein 91 <sup>274-495</sup>         | O60641     | 0.1 M NaOH                 |
|          |                                                 | Synaptosome Associated Protein 91 <sup>466-750</sup>         | O60641     | 1 M NaOH                   |
|          |                                                 | Synaptosome Associated Protein 91 <sup>750-906</sup>         | O60641     | 0.1 M NaOH                 |
| MOG      | Established MS Autoantigen                      | Myelin Oligodendrocyte Glycoprotein <sup>30-247</sup>        | Q16653     | 2 M NaOH + 1% Triton X-100 |
| MBP      | Established MS Autoantigen                      | Myelin Basic Protein <sup>1-304</sup>                        | P02686-1   | 1 M NaOH                   |
| PLP      | Established MS Autoantigen                      | Proteolipid Protein <sup>37-63+89-151+178-233+261-277</sup>  | P60201     | 2 M NaOH + 1% Triton X-100 |

**Data S1.**

Source and complete statistical data for Fig. 1

**Data S2.**

Source and complete statistical data for Fig. 2

**Data S3.**

Source and complete statistical data for Fig. 3

**Data S4.**

Source and complete statistical data for Fig. 4

**Data S5.**

Source and complete statistical data for Fig. 5

**Data S6.**

Source and complete statistical data for Fig. 6

**Data S7.**

Source and complete statistical data for Fig. 7

**Data S8.**

Source data for Fig. S1-S6
